# Supplementary material
Source: PubMed Central journal article supplement (PMC4886821)

# 5 mM Paraquat

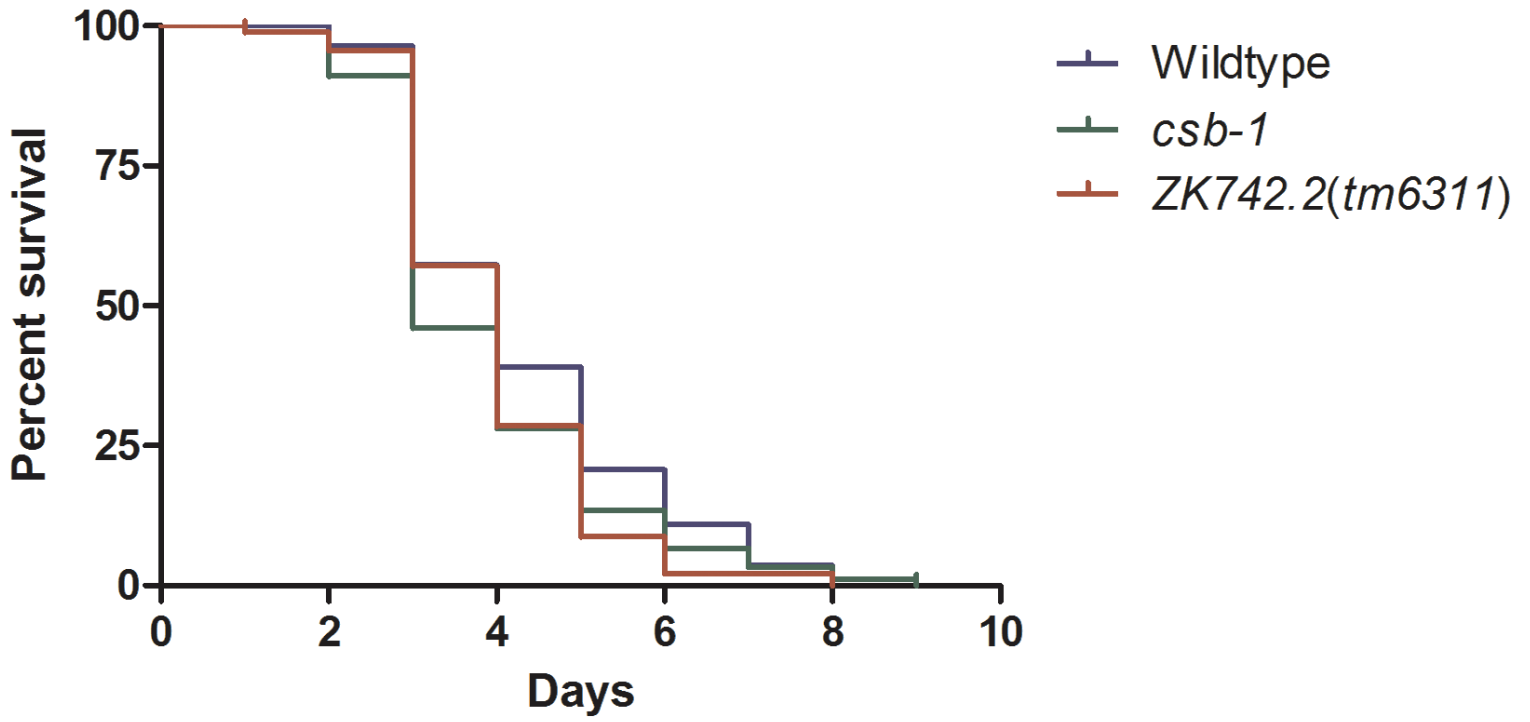

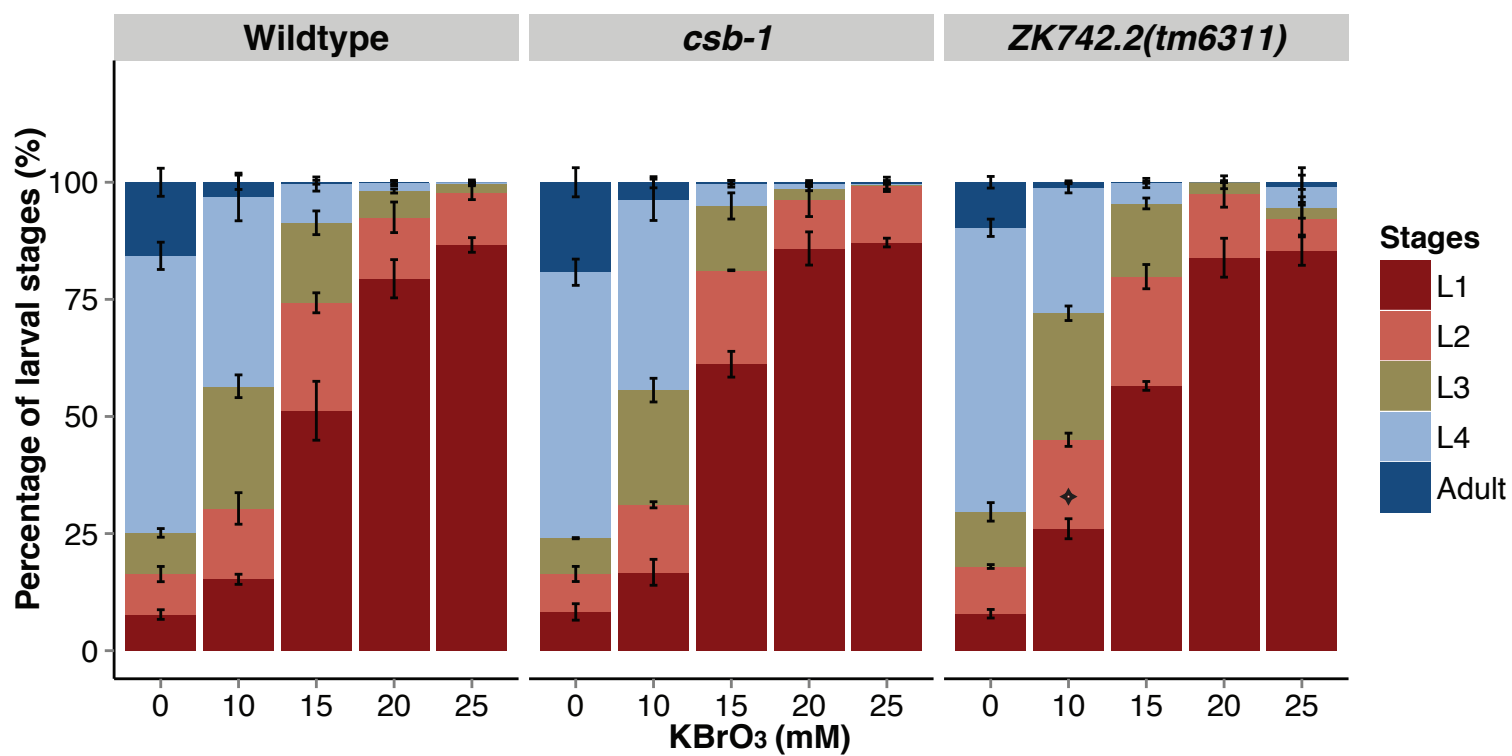

Supplement: NIHMS68418-supplement-Supplementary_Figures.pdf [file NIHMS68418-supplement-Supplementary_Figures.pdf]
